# Supplementary material
Source: MDPI journal article supplement (https://www.mdpi.com/2076-3417/7/6/542)
Supplement: s1 [file s1]

# Supplementary Materials: Near-field coupling and mode competition in multiple anapole systems

Valerio Mazzone, Juan Sebastian Toterogongora and Andrea Fratalocchi\*

## Supplementary Figures

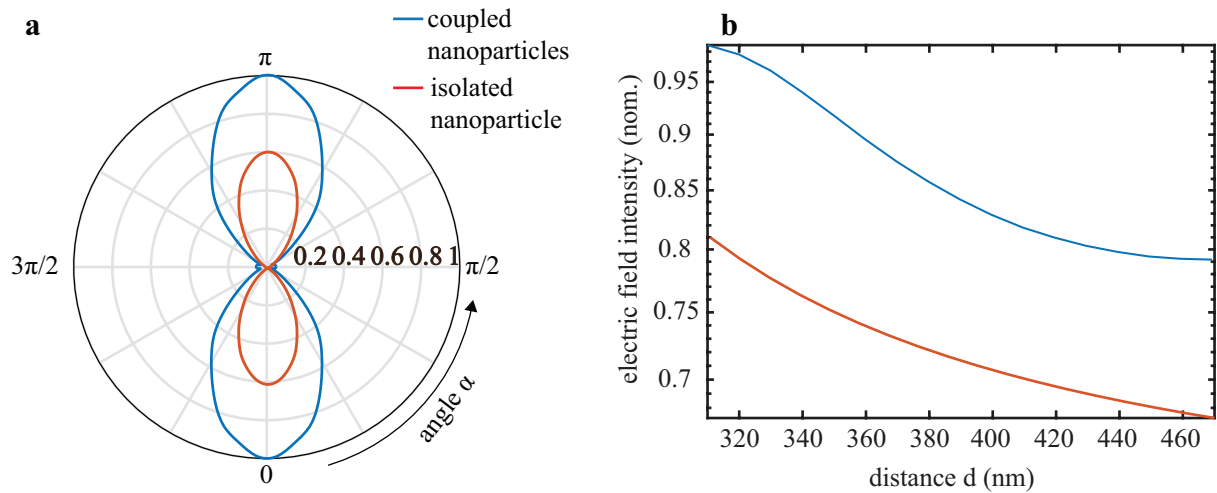

**Figure S1. Scattered field from an isolated anapole state.** **a,b** Electric field intensity for coupled anapole nanoparticles (blue line) and in the exterior of an isolated nanoparticle (orange line) as a function of (a) the rotation angle  $\alpha$  and (b) of the center-center distance  $d$ . The angular distribution was measured at a distance  $d = 450$  nm.
